# Supplementary material for: Illuminating drug action by network integration of disease genes: a case study of myocardial infarction
Source: Royal Society of Chemistry journal article supplement (doi:10.1039/c6mb00052e), 2016-03-08
Supplement: c6mb00052e2.xlsx [file c6mb00052e2.xlsx]

## Sheet: Sheet1
Drug name	Targets	Module ID	Cardiovascular Effect	Ref.
sulindac	AKR1B1, MAPK3, PPARD, PTGS1, PTGS2	1, 5, 7	Cardiac failure; tachycardia; vasculitis	[1]
allopurinol	HPRT1, XDH	1	Thrombophlebitis; vasculitis; peripheral vascular disorder; bradycardia	[1]
gemcitabine	RRM1, TYMS	1	Arrhythmia; atrial fibrillation; cardiac failure; myocardial infarction	[1,2]
minocycline	ALOX5, CASP1, CASP3, CYCS, IL1B, MMP9	1, 4, 5, 8	Vasculitis; myocarditis	[1]
valproic acid	ABAT, ACADSB, HDAC9	1, 5, 11	Tachycardia; vasculitis; vasodilation; bradycardia	[1]
propylthiouracil	TPO	1	Vasculitis	[1]
tretinoin	ALDH1A1, ALDH1A2, GPRC5A, NR0B1, RARG, RXRB, RXRG	1, 5	Tachycardia	[1]
tizanidine	ADRA2A, ADRA2B, ADRA2C, NISCH	2, 3	Bradycardia; arrhythmia; myocardial infarction; coronary artery disease	[1]
somatropin recombinant	GHR, PRLR	2	Cardiac arrest; cardiac failure; arterial thrombosis	[1]
imatinib	ABCB1, ABL1, CSF1R, DDR1, KIT, NTRK1, PDGFRA, PDGFRB, RET	2, 11	Cardiac failure; tachycardia; pulmonary fibrosis ; thrombosis	[1]
diazepam	GABRA1, GABRA2, GABRA3, GABRA5, GABRB1, GABRB2, GABRB3, GABRD, GABRE, GABRG1, GABRG2, GABRG3, GABRR1, GABRR2, GABRR3	2	Venous thrombosis; vasodilation; bradycardia	[1]
midazolam	GABRA1, GABRA2, GABRA3, GABRA4, GABRA5, GABRA6, GABRB1, GABRB2, GABRB3, GABRD, GABRE, GABRG1, GABRG2, GABRG3, GABRR1, GABRR2, GABRR3	2	Bradycardia; tachycardia	[1]
clozapine	ADRA1A, ADRA1B, ADRA2A, ADRA2B, ADRA2C, CHRM1, CHRM2, CHRM3, CHRM4, CHRM5, DRD1, DRD2, DRD3, DRD4, HRH1, HRH4, HTR1A, HTR1B, HTR1D, HTR1E, HTR2A, HTR2C, HTR3A, HTR6, HTR7	2, 3	Tachycardia; metabolic syndrome; myocardial infarction; ventricular fibrillation; venous thrombosis	[1,2]
escitalopram	DRA1A, CHRM1, HRH1, SLC6A2, SLC6A3, SLC6A4	2, 3, 9	Tachycardia; arrhythmia; cardiac failure; myocardial infarction; atrial fibrillation	[1]
imipramine	ADRA1A, ADRA1D, CHRM1, CHRM2, CHRM3, CHRM4, CHRM5, HRH1, HTR2A, KCND2, KCND3, SLC6A2, SLC6A4,	2, 3, 9	Arrhythmia; cardiac failure; myocardial infarction; tachycardia	[1]
Trazodone	ADRA1A, ADRA2A, HRH1, HTR1A, HTR2A, HTR2C, SLC6A4	2, 3, 9	Arrhythmia; cardiac arrest; ventricular tachycardia; myocardial infarction	[1]
clonidine	ADRA2A, ADRA2B, ADRA2C	2, 3	Bradycardia; tachycardia; arrhythmia; cardiac arrest; cardiac failure	[1,2, 3]
dihydroergotamine	ADRA2A, HTR1B, HTR1D, HTR2B	2, 3	Tachycardia; myocardial infarction; cardiac fibrillation; myocardial ischaemia	[1]
nefazodone	ADRA1A, ADRA1B, ADRA2A, HTR1A, HTR2A, HTR2C, SLC6A2, SLC6A3, SLC6A4	2, 3,9	Tachycardia; cardiac failure; cerebrovascular accident; bradycardia	[1]
gefitinib	EGFR	2	Pulmonary fibrosis; atrial fibrillation; cardiac fibrillation	[1]
lidocaine	EGFR, SCN10A, SCN5A	2	Cardiac arrest; bradycardia	[1]
cyclosporine	ABCB1, CAMLG, PPIA, PPP3R2	2	Arrhythmia; cardiac failure; myocardial infarction; thrombosis	[1]
ciprofloxacin	TOP2A	2	Arrhythmia; atrial flutter; cardiac arrest; myocardial infarction	[1]
levofloxacin	TOP2A	2	Tachycardia; vasodilation; cardiac arrest; myocardial infarction	[1]
moxifloxacin	TOP2A	2	Cardiac arrest; tachycardia; tachyarrhythmia; cardiac fibrillation	[1]
norfloxacin	TOP2A	2	Myocardial infarction	[1]
ofloxacin	TOP2A	2	Tachycardia; thrombosis; vasodilation; arrhythmia	[1]
insulin detemir	INSR	2	Tachycardia	[1]
insulin glulisine	INSR	2	Tachycardia	[1]
amifostine	ALPPL2, ENPP1		Arrhythmia; tachycardia; cardiac flutter; myocardial infarction	[1]
dexamethasone	ANXA1, CXCL12, NR0B1, NR3C1	2, 5, 8	Arrhythmia; cardiac failure; myocardial infarction; cardiomyopathy	[1]
hydrocortisone	ANXA1, NR3C1	2, 5	thrombophlebitis; vasculitis	[1]
clomipramine	GSTP1, HTR2A, HTR2B, HTR2C, SLC6A2, SLC6A4	2, 3, 9	Arrhythmia; tachycardia; cardiac arrest; cardiac flutter; myocardial infarction	[1]
pentoxifylline	ADORA1, ADORA2A, NT5E, PDE4A, PDE4B, PDE5A	2, 3, 6	Arrhythmia; tachycardia	[1]
tadalafil	PDE11A, PDE5A	2, 6	Cardiovascular disorder; myocardial infarction; tachycardia; coronary artery disease	[1,2]
theophylline	ADORA1, ADORA2A, ADORA2B, PDE3A, PDE4A, PDE4B, PDE5A	2, 3, 6	Tachycardia; arrhythmia; cardiac fibrillation	[1]
vardenafil	PDE5A, PDE6G, PDE6H	2, 6	Coronary artery disease; myocardial infarction; tachycardia	[1,2]
isoproterenol	ADRB1, ADRB2, ADRB3, MAPK1, PIK3R1, PIK3R2, PIK3R3	2, 3, 4, 5, 8	Arrhythmia; tachyarrhythmia	[1,2]
phenobarbital	CHRNA4, CHRNA7, GABRA1, GABRA2, GABRA3, GABRA4, GABRA5, GABRA6, GRIA1, GRIA2, GRIK2	2	Bradycardia	[1]
carvedilol	ABCB1, ADRA1A, ADRB1, ADRB2, GJA1, KCNH2, NDUFC2, NPPB, VCAM1	2, 3, 6, 10	Tachycardia; cerebrovascular disorder; atrial fibrillation	[1]
propafenone	ABCB1, KCNH2, SCN5A	2	Cardiac failure; bradycardia; cardiac arrest	[1]
quinidine	ABCB1, KCNH2, KCNK1, SCN5A	2	Cerebral ischaemia; atrial fibrillation; vasculitis	[1]
rifampin	ABCB1, NR1I2	2, 5	Vasculitis	[1]
gliclazide	ABCC8	2	Vasculitis; arteritis; coronary heart disease; cardiac disorder	[1]
glipizide	ABCC8, PPARG	2, 5	Arrhythmia	[1]
repaglinide	ABCC8, PPARG	2, 5	Cardiac failure; arterial disorder; coronary artery disease; myocardial infarction;	[1]
diazoxide	ATP1A1, CA1, CA2, KCNJ11, KCNMA1, SLC12A3	2, 3, 5	Tachycardia	[1]
celecoxib	PDPK1, PTGS2	2, 7	Risk of cardiovascular complications; cardiac failure; myocardial infarction; thrombosis	[1, 4, 5]
fluoxetine	HTR2A, SLC6A4	3, 9	Arrhythmia; atrial fibrillation; vasodilation; cardiac failure; myocardial infarction	[1]
paroxetine	CHRM1, CHRM2, CHRM3, CHRM4, CHRM5, HTR2A, SLC6A2, SLC6A4	3, 9	Tachycardia; arrhythmia; atrial fibrillation; myocardial infarction	[1]
thioridazine	ADRA1A, ADRA1B, DRD1, DRD2, HTR2A, KCNH2	3	Torsades de Pointes ventricular tachycardia	[1,2]
labetalol	ADRA1A, ADRA1B, ADRB1, ADRB2	3	Arrhythmia; cardiac failure	[1]
nicardipine	ADRA1A, ADRA1B, ADRA1D, CACNA1C, CACNA1D, CACNA2D1, CACNB2, CALM1, CHRM1, CHRM2, CHRM3, CHRM4, CHRM5, PDE1A, PDE1B	3, 5, 6, 11	Myocardial infarction; ventricular tachycardia	[1]
prazosin	ADRA1A, ADRA1B, ADRA1D, KCNH2, KCNH6, KCNH7	3	Tachycardia; vasculitis	[1]
terazosin	ADRA1A, ADRA1B, ADRA1D, KCNH2, KCNH6, KCNH7	3	Tachycardia; atrial fibrillation; arrhythmia	[1]
aminophylline	ADORA1, ADORA3, PDE3A	3, 6	Atrial fibrillation; tachycardia; arrhythmia; cardiac flutter	[1,2]
bosentan	EDNRA, EDNRB	3	Cardiac failure	[1]
treprostinil	P2RY12, PPARD, PTGIR	3, 5	Vasodilation; thrombophlebitis	[1]
acebutolol	ADRB1, ADRB2	3	Cardiac output decreased; cardiac failure; bradycardia	[1]
amiodarone	ADRB1, CACNA1H, CACNA2D2, KCNH2	3	Bradycardia; cardiac arrest; cardiac failure; thrombosis	[1]
atenolol	ADRB1	3	Cardiac failure; bradycardia; cardiac fibrillation; arrhythmia	[1]
betaxolol	ADRB1, ADRB2	3	Block heart; cardiac failure; bradycardia	[1]
bisoprolol	ADRB1, ADRB2	3	Cardiac failure; vasculitis; bradycardia; myocardial infarction	[1]
epinephrine	ADRA1A, ADRB1, ADRB2, PAH	3, 5	Arrhythmia; coronary artery disease; cardiovascular disorder	[1]
esmolol	ADRB1	3	Cardiac arrest; cardiac failure; myocardial infarction; thrombophlebitis; coronary artery disease	[1]
metoprolol	ADRB1, ADRB2	3	Bradycardia; block heart; cardiac failure congestive	[1]
nadolol	ADRB1, ADRB2	3	Cardiac failure; arterial thrombosis; vascular insufficiency	[1]
pindolol	ADRB1, ADRB2, ADRB3, HTR1A, HTR1B	3	Cardiac failure; tachycardia; bradycardia	[1]
pirbuterol	ADRB1, ADRB2	3	Tachycardia	[1]
propranolol	ADRB1, ADRB2, ADRB3, HTR1A, HTR1B	3	Arterial insufficiency; cardiac failure; arterial thrombosis	[1]
salbutamol	ADRB1, ADRB2	3	Arrhythmia; tachycardia; atrial fibrillation	[1]
sotalol	ADRB1, ADRB2, KCNH2	3	QT interval prolongation; proarrhythmia; bradycardia; cardiac failure; cerebrovascular accident	[1,2, 6]
timolol	ADRB1, ADRB2	3	Bradycardia; cardiac failure; arrhythmia	[1]
formoterol	ADRB2	3	Electrocardiogram QT prolonged; arrhythmia; tachycardia; myocardial infarction	[1]
salmeterol	ADRB2	3	Arrhythmia; atrial fibrillation; tachycardia	[1]
terbutaline	ADRB2	3	Tachycardia; vasodilation; vasculitis	[1]
propoxyphene	OPRD1, OPRK1, OPRM1	3	Arrhythmia; cardiac disorder; myocardial infarction	[1]
tramadol	HTR2C, OPRD1, OPRK1, OPRM1, SLC6A2, SLC6A4	3, 9	Tachycardia; vasodilation; myocardial ischaemia	[1]
telmisartan	AGTR1, PPARG	3, 5	Atrial fibrillation; cardiac failure; cerebrovascular disorder	[1]
buspirone	DRD2, HTR1A	3	Tachycardia; cardiac failure; myocardial infarction; bradycardia	[1]
conivaptan	AVPR1A, AVPR2	3	Atrial fibrillation; electrocardiogram ST segment; cardiac disorder	[1]
zafirlukast	CYSLTR1	3	Vasculitis	[1]
mefloquine	ADORA2A, HBA1	3, 6	Cardiovascular disorder; tachycardia; bradycardia	[1]
disopyramide	CHRM1, CHRM2, CHRM3, KCND2, KCND3, SCN5A	3	Cardiac failure; cardiac failure congestive	[1]
tolterodine	CHRM1, CHRM2, CHRM3, CHRM4, CHRM5	3	Tachycardia	[1]
trandolapril	ACE	3	Bradycardia; cerebrovascular accident	[1]
levothyroxine	THRA, THRB	5	Cardiac arrest; cardiac failure; tachycardia;	[1]
betamethasone	NR3C1	5	Hypertrophic cardiomyopathy; cardiac arrest; cardiac failure	[1]
fludrocortisone	NR3C1, NR3C2	5	Cardiomegaly; cardiac failure; thrombophlebitis; Vasculitis	[1]
Rosiglitazone	ACSL4, PPARG	5	Adverse cardiac effects; cardiac failure	[1,7,8]
methylprednisolone	NR3C1	5	Atrial fibrillation; arrhythmia; cardiac arrest; cardiac failure; myocardial infarction	[1,2, 9]
prednisolone	NR3C1	5	Cardiac failure	[1]
prednisone	NR3C1	5	Cardiac failure	[1]
triamcinolone	NR3C1	5	Arrhythmia; cardiac arrest; cardiac failure; myocardial infarction	[1]
indomethacin	GLO1, PLA2G2A, PPARG, PTGS1, PTGS2	5, 7	Thrombophlebitis; cardiac failure; tachycardia; vasculitis	[1]
fenofibrate	PPARA	5	Arrhythmia; atrial fibrillation; tachycardia; myocardial infarction	[1]
gemfibrozil	PPARA	5	Atrial fibrillation; vasculitis; peripheral vascular disorder	[1]
tamoxifen	ESR1, ESR2	5	Thrombosis; cerebrovascular accident	[1]
medroxyprogesterone	ESR1, PGR	5	Cardiac disorder; tachycardia; thrombosis	[1]
topotecan	TOP1	5	Cardiac arrest	[1]
etodolac	PTGS1, PTGS2, RXRA	5,7	Arrhythmia; cardiac failure; myocardial infarction; cerebrovascular accident	[1]
digoxin	ATP1A1	5	Arrhythmia; cardiac arrest; block heart; tachycardia	[1]
ethacrynic acid	ATP1A1, SLC12A1	5	Rheumatic heart disease	[1]
potassium	ATP1A1	5	Thrombosis	[1]
lithium	GSK3B, IMPA1, IMPA2	5	Arrhythmia; bradycardia	[1]
leflunomide	ALOX5, DHODH	5, 12	Cardiovascular disorder; tachycardia; vasculitis	[1]
lovastatin	HDAC2, HMGCR, ITGAL	5, 10	Vasculitis	[1]
spironolactone	NR3C2	5	Vasculitis	[1]
nilutamide	AR	5	Cardiac failure	[1]
itraconazole	CYP51A1	7	Cardiac disorder; cardiac failure; vasculitis	[1]
posaconazole	CYP51A1	7	Arrhythmia;	[1]
ketoconazole	CYP51A1	7	Arrhythmia; electrocardiogram QT prolonged	[1]
voriconazole	CYP51A1	7	Arrhythmia; atrial fibrillation; cardiac arrest; myocardial infarction; tachycardia	[1]
diflunisal	PTGS1, PTGS2	7	Vasculitis	[1]
fenoprofen	PTGS1, PTGS2	7	Tachycardia; electrocardiogram change	[1]
flurbiprofen	PTGS1, PTGS2	7	Arrhythmia; cardiac failure; myocardial infarction; tachycardia	[1]
ketoprofen	PTGS1, PTGS2	7	Arrhythmia; cardiac failure; myocardial infarction; tachycardia	[1]
ketorolac	PTGS1, PTGS2	7	Tachycardia	[1]
meloxicam	PTGS1, PTGS2	7	Arrhythmia; cardiac failure; tachycardia; vasculitis	[1]
nabumetone	PTGS1, PTGS2	7	Arrhythmia; myocardial infarction; thrombophlebitis; vasculitis	[1]
oxaprozin	PTGS1, PTGS2	7	Arrhythmia; cardiac failure; myocardial infarction; tachycardia; vasculitis	[1]
piroxicam	PTGS1, PTGS2	7	Arrhythmia; cardiac failure; myocardial infarction; tachycardia; vasculitis	[1]
tolmetin	PTGS1, PTGS2	7	Cardiac failure	[1]
tacrolimus	FKBP1A	8	Arrhythmia; atrial fibrillation; myocardial infarction; thrombosis	[1]
heparin	F10, F2, F9, SELP, SERPINC1	9	Myocardial infarction; cerebrovascular accident	[1]
citalopram	SLC6A4	9	Tachycardia; arrhythmia; cardiac failure; myocardial infarction	[1]
fluvoxamine	SLC6A4	9	Vasodilation; myocardial infarction; tachycardia; bradycardia	[1]
aprotinin	CTRB1, KLK1, PLG, PRSS1	9	Arrhythmia; cardiac arrest; myocardial infarction; thrombosis	[1]
methotrexate	DHFR	9	Thrombophlebitis; thrombosis; vasculitis	[1]
orlistat	FASN, LIPF, PNLIP	9	Cardiovascular disorder	[1]
quinine	GP9, KCNN4	10	Atrial fibrillation; tachycardia; vasculitis	[1]
Simvastatin	HMGCR, ITGB2	10	Atrial fibrillation; cardiac fibrillation; vasculitis	[1,2,3]
bortezomib	PSMB1, PSMB2, PSMB5, PSMD1, PSMD2	12	Atrial fibrillation; cardiac arrest; myocardial infarction; tachycardia; thrombosis	[1]
References
[1] Kuhn, M., et al., A side effect resource to capture phenotypic effects of drugs. Mol Syst Biol, 2010. 6: p. 343.
[2] Raj, S.R., et al., Cardiovascular effects of noncardiovascular drugs. Circulation, 2009. 120(12): p. 1123-32.
[3] Moro, H., et al., Rhabdomyolysis after simvastatin therapy in an HIVinfected patient with chronic renal failure. AIDS Patient Care STDS. 2004;18:687-690.
[4] Azuaje, F.J., et al., Drug-target network in myocardial infarction reveals multiple side effects of unrelated drugs. Sci Rep. 2011;1:52.
[5]Gislason, G.H., et al., Increased mortality and cardiovascular morbidity associated with use of nonsteroidal anti-inflammatory drugs in chronic heart failure. Arch Intern Med. 2009 Jan 26;169(2):141-9.
[6]Roden, D.M., Cellular basis of drug-induced torsades de pointes. Br J Pharmacol. 2008;154:1502-1507.
[7] Azuaje, F.J., Prediction of adverse cardiovascular events of noncardiovascular drugs through drug-target interaction networks. Clin Transl Sci. 2012 Feb;5(1):111
[8] Graham, D. J., et al., Risk of acute myocardial infarction, stroke, heart failure, and death in elderly Medicare patients treated with rosiglitazone or pioglitazone. JAMA 304, 411-418 (2010).
[9] van der Hooft CS, Heeringa J, Brusselle GG, Hofman A, Witteman JC, Kingma JH, Sturkenboom MC, Stricker BH. Corticosteroids and the risk of atrial fibrillation. Arch Intern Med. 2006;166:1016 -1020.
